# Supplementary material for: Piezo-Responsive Hydrogen-Bonded Frameworks Based on Vanillin-Barbiturate Conjugates
Source: MDPI journal article supplement (doi:10.3390/molecules27175659), 2022-09-02
Supplement: s1 [file s1]

Coordinates from ORCA-job compound **3a**

|   |                    |                   |                   |
|---|--------------------|-------------------|-------------------|
| O | -11.67212709066238 | -5.83231652144865 | 1.20812095717952  |
| H | -11.36315353540673 | -6.75531323849910 | 1.21854943106860  |
| C | -10.58552645369771 | -5.05476412634922 | 1.09890187446402  |
| C | -10.69832031211735 | -3.66256140165706 | 1.05381365508320  |
| C | -9.29917512615403  | -5.65232222864277 | 1.03107026614491  |
| C | -9.55364808965329  | -2.88238755108176 | 0.94692361214276  |
| C | -8.16018575876351  | -4.87853123434719 | 0.90975918211011  |
| C | -8.26299655680625  | -3.46316819328370 | 0.86316284204519  |
| O | -5.29554289707999  | -4.95513008311054 | 0.55293068525369  |
| H | -9.64915592010546  | -1.79476099750379 | 0.91825691484131  |
| H | -7.17051754028323  | -5.32269589377578 | 0.84850036491879  |
| C | -7.16633187649367  | -2.53933304464331 | 0.73551833566108  |
| C | -4.95181805569588  | -3.79015213386111 | 0.41331688205319  |
| C | -5.80287139729394  | -2.59122461228915 | 0.54919886187698  |
| N | -3.61941383497741  | -3.53671153268275 | 0.08572253928084  |
| C | -2.98879343089557  | -2.31611394583213 | -0.10772214887279 |
| H | -3.03387237654678  | -4.35783637908690 | -0.04053915476242 |
| O | -1.82619303280650  | -2.21527490115414 | -0.42769813331181 |
| H | -7.49742190067829  | -1.49542834441852 | 0.77954455838179  |
| C | -5.16643959054691  | -1.24077379754612 | 0.44841347387235  |
| N | -3.81613010982303  | -1.22959334468820 | 0.11090587689265  |
| O | -5.74998533372957  | -0.18720206107423 | 0.62190003629413  |
| H | -3.38783685493022  | -0.31373754693992 | 0.00784012983897  |
| H | -11.69289590803482 | -3.21717748449355 | 1.10884706047217  |
| O | -9.32944154854510  | -7.01248352121996 | 1.10168901856768  |
| C | -8.10399881293975  | -7.71334189122707 | 0.97928984607433  |
| H | -8.34602491273084  | -8.78175848510466 | 1.04952054122151  |
| H | -7.40303984200576  | -7.43820968829229 | 1.78494801983329  |
| H | -7.62095190059584  | -7.50285581574637 | 0.00965447137390  |

Coordinates from ORCA-job compound **3b**

|   |                    |                   |                  |
|---|--------------------|-------------------|------------------|
| O | -11.73027804803553 | -5.72893417798498 | 1.24210679778824 |
|---|--------------------|-------------------|------------------|

|   |                    |                   |                   |
|---|--------------------|-------------------|-------------------|
| H | -11.43293037239332 | -6.65581107043603 | 1.26490090119454  |
| C | -10.63200769175193 | -4.97016091972407 | 1.11803297056179  |
| C | -10.72268605662365 | -3.57777101202557 | 1.04338384505018  |
| C | -9.35609797836273  | -5.59179646140012 | 1.05984611289766  |
| C | -9.56479486995801  | -2.81921013009417 | 0.92453881516949  |
| C | -8.20288747603686  | -4.83829291424118 | 0.93836347691230  |
| C | -8.28283339218298  | -3.42202628909422 | 0.86458817163198  |
| O | -5.32744933552584  | -4.95535298611679 | 0.65352484423219  |
| H | -9.64262586632428  | -1.73134888696334 | 0.86595656801585  |
| H | -7.21995977184408  | -5.29960025365972 | 0.89966683111891  |
| C | -7.17254610786582  | -2.51552140068210 | 0.72679789437619  |
| C | -4.96980235153577  | -3.80048295726220 | 0.47239546046216  |
| C | -5.80763552371042  | -2.58796194254178 | 0.55889869745313  |
| N | -3.63268733448001  | -3.57385875294408 | 0.14305549906310  |
| C | -2.98488802498806  | -2.36742538117551 | -0.08041978865845 |
| H | -3.05478889865947  | -4.40513870922388 | 0.05424882991383  |
| O | -1.81828484636532  | -2.29072008411169 | -0.39289013669574 |
| H | -7.49169791987050  | -1.46695409932031 | 0.73649808988193  |
| C | -5.15302985853455  | -1.24899761836161 | 0.42582813285627  |
| N | -3.79990725112798  | -1.26435764693080 | 0.09891949914037  |
| O | -5.72374349830114  | -0.18358990220352 | 0.56564629543259  |
| H | -3.36006280339673  | -0.35724018432515 | -0.02978226428753 |
| H | -11.71026401257076 | -3.11523996398464 | 1.08075784122580  |
| O | -9.41549998401133  | -6.94990940642648 | 1.13487618960882  |
| C | -8.21750300400960  | -7.70160468382585 | 0.93986725834571  |
| C | -8.58655645301726  | -9.16988440083670 | 0.89624141298759  |
| H | -7.51059368252433  | -7.48225865225074 | 1.75952037735711  |
| H | -7.73653394628306  | -7.37901234282128 | -0.00036827989318 |
| H | -9.04766115915616  | -9.48986685732037 | 1.84379190288942  |
| H | -7.68732220792298  | -9.78034013906759 | 0.72115164099351  |
| H | -9.30053027262933  | -9.36743977264342 | 0.08208611297423  |

Coordinates from ORCA-job 1'

|   |                    |                   |                   |
|---|--------------------|-------------------|-------------------|
| O | -11.80012343112427 | -5.84933883167373 | 0.65192366216619  |
| H | -11.48341009986417 | -6.76966674498072 | 0.65683656754153  |
| C | -10.71601102525096 | -5.06038763530916 | 0.66953718509637  |
| C | -10.84224784187964 | -3.66870162716978 | 0.68031059012808  |
| C | -9.42144537152772  | -5.64433625176427 | 0.68215222707614  |
| C | -9.70234953126422  | -2.87581037362396 | 0.70903923799554  |
| C | -8.28541080500221  | -4.85680189585763 | 0.71155575790447  |
| C | -8.40311600023249  | -3.44252180288599 | 0.72640461185736  |
| O | -5.38812753841218  | -4.86842477553616 | 0.70489234830981  |
| H | -9.80710148807056  | -1.78868949960160 | 0.71968181967358  |
| H | -7.28740546335509  | -5.28691941695425 | 0.72606030090056  |
| C | -7.31464387407542  | -2.50327020173112 | 0.76503157161955  |
| C | -5.04099898526453  | -3.69778103044930 | 0.70434652565484  |
| C | -5.93803141329235  | -2.52264063161839 | 0.76370453076612  |
| N | -3.67259698443130  | -3.41065549795813 | 0.63850283812137  |
| C | -3.08549364910607  | -2.16968742407820 | 0.61924806053264  |
| H | -3.02382728832138  | -4.21168306342861 | 0.56172301524113  |
| O | -1.88043156312190  | -1.98772277932603 | 0.52315938208984  |
| H | -7.66941315271736  | -1.46713552316157 | 0.80346940858363  |
| C | -5.34052338642824  | -1.15563940019084 | 0.81537546009183  |
| N | -3.95339784211054  | -1.10596003488396 | 0.72332881279700  |
| O | -5.97252531561256  | -0.12108691772991 | 0.91763313057137  |
| H | -3.53009126893037  | -0.18198198942210 | 0.72510382329741  |
| H | -11.84308756894071 | -3.23425089828020 | 0.67024327793525  |
| O | -9.43918865620475  | -7.00644231376733 | 0.66719743669632  |
| C | -8.19986246535450  | -7.68705204487063 | 0.76975435277753  |
| H | -8.43132266575963  | -8.76000709439129 | 0.77532039854211  |
| H | -7.67356559585162  | -7.41384570447187 | 1.70040480799818  |
| H | -7.54214389271135  | -7.45295669059955 | -0.08381353648972 |
| O | -1.51682031953606  | -5.36587687110337 | 0.36286074875762  |
| C | -0.32684392668600  | -5.09431705350713 | 0.26867033647370  |
| H | 5.73343590172918   | -8.53779361240334 | 1.50906254591766  |

|   |                   |                   |                   |
|---|-------------------|-------------------|-------------------|
| N | 0.15098730269168  | -3.82089293674436 | 0.12502019457828  |
| N | 0.64612925458506  | -6.07942911582800 | 0.29927118550845  |
| H | -0.55643893076877 | -3.06590973074091 | 0.17409517770766  |
| C | 1.48468168950672  | -3.43630985032914 | 0.03556456427365  |
| C | 2.03558000996058  | -5.92448245113354 | 0.26568050461817  |
| C | 2.50082364718793  | -4.53618217483543 | 0.11013986866755  |
| H | 0.31107768187183  | -7.03194202234975 | 0.41319109553476  |
| C | 6.17542893098755  | -3.68277877982988 | -0.07366744412587 |
| C | 7.51166170061588  | -4.06156868726781 | -0.05534563949657 |
| C | 3.79813641457416  | -4.08588120455133 | 0.03033252319889  |
| O | 1.76667521959168  | -2.25934636609189 | -0.08502580695248 |
| C | 5.13039470683352  | -4.63012118685033 | 0.06575228049427  |
| C | 7.84335695553859  | -5.40750647369581 | 0.11095698270612  |
| O | 2.72917280161796  | -6.92631207315415 | 0.36246923745228  |
| C | 5.47926082167981  | -5.99709755639190 | 0.23761555888650  |
| O | 9.12336304052109  | -5.80372608127962 | 0.12513574145259  |
| C | 6.81068898402436  | -6.36978775075386 | 0.26845254062296  |
| H | 5.91947885410625  | -2.62902611261448 | -0.20282455920110 |
| H | 8.31724807957969  | -3.33447463546515 | -0.16981464794134 |
| H | 3.80024544874505  | -2.99633511314353 | -0.09184374826029 |
| C | 6.35788343021965  | -8.69269582105032 | 0.61242143519268  |
| O | 7.28414804269930  | -7.63596536349124 | 0.44443459566457  |
| H | 9.12272180593270  | -6.76717015659520 | 0.26160691029517  |
| H | 4.67745816291064  | -6.72292020059073 | 0.34876100932317  |
| H | 6.95149631513643  | -9.60866647306873 | 0.73096429651509  |
| H | 5.69616213836205  | -8.79043604942165 | -0.26476509334024 |

Coordinates from ORCA-job 1"

|   |                    |                   |                  |
|---|--------------------|-------------------|------------------|
| O | -10.24830424387183 | -8.38153680207465 | 0.57330664888664 |
| H | -9.81031927460244  | -9.22190537856494 | 0.35043572205008 |
| C | -9.31058467482567  | -7.42555140021840 | 0.51648060585535 |
| C | -9.63164698149998  | -6.08772099544780 | 0.76046553510641 |
| C | -7.97452711401669  | -7.77738924149034 | 0.18610661928995 |

|   |                    |                    |                   |
|---|--------------------|--------------------|-------------------|
| C | -8.63850751283115  | -5.11973893507510  | 0.68173461405704  |
| C | -6.97846706526503  | -6.81999848867511  | 0.14343334326823  |
| C | -7.29307837428021  | -5.45629488620969  | 0.38875323809273  |
| O | -4.13529242214807  | -6.41230679132886  | 0.13834303311012  |
| H | -8.89712490524039  | -4.07306455757900  | 0.85736615111472  |
| H | -5.94712156843919  | -7.08368809359018  | -0.07308814343301 |
| C | -6.37210004593531  | -4.35030504887873  | 0.33692081500663  |
| C | -3.97249963580565  | -5.20154344541939  | 0.15894038045673  |
| C | -5.01495677021942  | -4.16287604112652  | 0.21085789831384  |
| N | -2.66350735803891  | -4.71659241260539  | 0.14497981900705  |
| C | -2.23948749684094  | -3.40333839840192  | 0.07582041133794  |
| H | -1.92998949103284  | -5.41928019419978  | 0.11507469876585  |
| O | -1.04973452927674  | -3.12958244244061  | 0.00328156524886  |
| H | -6.87743210995222  | -3.38123858742870  | 0.41943932332670  |
| C | -4.60722924975475  | -2.72035687774207  | 0.16781711609284  |
| N | -3.23833403962043  | -2.46764785292738  | 0.09160448856407  |
| O | -5.39552280421734  | -1.79478382513721  | 0.18677153119165  |
| H | -2.92580626529491  | -1.48488249948549  | 0.00599397056673  |
| H | -10.66420521941576 | -5.82998655377344  | 1.00203629940263  |
| O | -7.81557828862778  | -9.10502209529625  | -0.07288914691976 |
| C | -6.58267397400951  | -9.56756934237134  | -0.62392627342739 |
| C | -6.78004305819386  | -11.00493364524187 | -1.06485458324881 |
| H | -5.78426100589139  | -9.47881982328675  | 0.13439012407521  |
| H | -6.29765728726267  | -8.92233098737642  | -1.47444299872348 |
| H | -7.07922127247550  | -11.63660895395091 | -0.21402986089189 |
| H | -5.84618920119094  | -11.40773574166076 | -1.48670729834646 |
| H | -7.56334330949678  | -11.07325440628129 | -1.83546617152221 |
| H | 7.61677754570401   | -3.37368027415948  | 1.04207966560032  |
| H | 5.43651653120786   | -2.16157965972853  | 0.65552197582469  |
| O | -2.03012937958779  | 0.04592004690238   | -0.34727884736847 |
| C | -0.88142958816130  | 0.29122685708465   | -0.68533707455266 |
| C | 6.67173895283708   | 1.33630063905515   | -2.73685345189520 |

|   |                   |                   |                   |
|---|-------------------|-------------------|-------------------|
| C | 6.84969305825665  | -3.78897218189344 | 0.37017419661954  |
| C | 5.32966889998312  | 1.68608978580861  | -2.64282855279821 |
| C | 7.12452644388173  | 0.16742162722502  | -2.11859125116199 |
| O | 8.41736004199588  | -0.18525604710587 | -2.15979422995536 |
| N | -0.50984628965097 | 1.55637883548421  | -1.08776667684786 |
| N | 0.12214849892005  | -0.64378928388132 | -0.69808857147289 |
| C | 5.95816794298396  | -2.68851397816297 | -0.16373440670069 |
| C | 4.39460244550807  | 0.86817664353348  | -1.96033794972911 |
| C | 6.20246068405697  | -0.66163830392879 | -1.42676649056284 |
| H | 7.39110015457513  | 1.96262199080916  | -3.26692483153253 |
| C | 0.75269661480446  | 1.97312402415516  | -1.50383506397902 |
| C | 3.04839185278688  | 1.37652165115507  | -1.88515035968774 |
| C | 1.82061684089049  | 0.93110812222397  | -1.45054673306798 |
| C | 1.46744700373814  | -0.43606941485700 | -1.00865627895602 |
| C | 4.86265726100516  | -0.32973901292650 | -1.35726460453467 |
| H | 6.25103245773822  | -4.52042591055637 | 0.93437302722001  |
| O | 6.78078952939604  | -1.76374539531501 | -0.87343712522164 |
| H | -1.24524311485612 | 2.25818904188216  | -1.09329807858264 |
| H | 4.98382927015377  | 2.61321446583984  | -3.10548091070571 |
| H | -0.16134003364091 | -1.59586182532766 | -0.40946456181760 |
| O | 0.91771769939924  | 3.12515778909570  | -1.85881176042470 |
| H | 8.49821404154610  | -1.02008642144480 | -1.66573035610460 |
| O | 2.23589037200419  | -1.38024831922739 | -0.91643641922155 |
| H | 2.97101431694677  | 2.40658056462701  | -2.25243534518676 |
| H | 4.14343320606073  | -0.97099167444458 | -0.85728392552243 |
| H | 7.35760111818708  | -4.31524649104182 | -0.45332598297423 |
| H | 5.18259217090374  | -3.08418314559329 | -0.84364850037436 |

Coordinates from ORCA-job 2'

|   |                    |                   |                  |
|---|--------------------|-------------------|------------------|
| O | -11.79658207693960 | -5.70297646123529 | 1.76602698467858 |
| H | -11.50142038388263 | -6.61769406091806 | 1.92069371251169 |
| C | -10.70179496953315 | -4.97261623216041 | 1.51754571221580 |
| C | -10.79285752784800 | -3.60072964915113 | 1.26886757902691 |

|   |                    |                   |                   |
|---|--------------------|-------------------|-------------------|
| C | -9.42750954814926  | -5.60324223815303 | 1.51342559263850  |
| C | -9.63668106562298  | -2.87292490637050 | 1.02182274058647  |
| C | -8.27716047085767  | -4.88659971161427 | 1.23848921055820  |
| C | -8.35964512820173  | -3.49013106146269 | 0.98472803840690  |
| O | -5.41195745831423  | -5.05063724855985 | 0.68221095503826  |
| H | -9.71046256150787  | -1.79908093114894 | 0.83628629250263  |
| H | -7.29847214036791  | -5.35938600087775 | 1.20558295235825  |
| C | -7.26146543019635  | -2.60840924272139 | 0.69903215016680  |
| C | -5.06611804762959  | -3.90636071177358 | 0.42944456188625  |
| C | -5.90399706763103  | -2.69508404169297 | 0.47318782247666  |
| N | -3.74224905022535  | -3.68485257545071 | 0.04256279327168  |
| C | -3.11207922618538  | -2.48309013819027 | -0.24632474057392 |
| H | -3.15763854918498  | -4.51388013742840 | -0.02087118392142 |
| O | -1.94633560391326  | -2.42615496181627 | -0.57935301501576 |
| H | -7.58390422481551  | -1.56429634410558 | 0.62292009893907  |
| C | -5.26176096504014  | -1.37701630388289 | 0.21080494826495  |
| N | -3.92158306440262  | -1.37195713707338 | -0.11476485131968 |
| O | -5.87933679977919  | -0.31772395677234 | 0.26937521431550  |
| H | -3.49997791585559  | -0.44553377018692 | -0.31254574847175 |
| H | -11.77641398520024 | -3.12837359061963 | 1.28269970942569  |
| O | -9.49275776099160  | -6.93186999597378 | 1.80680648749156  |
| C | -8.28776028423327  | -7.67389876455258 | 1.85725451370616  |
| H | -7.58845165909720  | -7.24611394000501 | 2.59509718120758  |
| H | -7.79138552747462  | -7.69775019164366 | 0.87230126939085  |
| H | -0.10831384068867  | -0.71021271411092 | -0.24856683281761 |
| O | -7.00300247969819  | 3.16075988923169  | 0.34447404894916  |
| C | -5.84677988626902  | 3.32549865582256  | 0.02885586656408  |
| C | 1.95849266795040   | 3.84016892764464  | -1.08383933998828 |
| C | 0.65827816265043   | 4.31667744027955  | -0.97226994989735 |
| C | 2.18239344014249   | 2.46453072814239  | -1.17473112314733 |
| O | 3.42269811075723   | 1.97445514786306  | -1.29745612904303 |
| N | -5.30740710235057  | 4.57637361667571  | -0.22867311709178 |

|   |                   |                   |                   |
|---|-------------------|-------------------|-------------------|
| N | -4.94625264742788 | 2.28238364851420  | -0.11865027216047 |
| C | 0.43019140138581  | -0.72940368497341 | -1.20726066449500 |
| C | -0.45500309870656 | 3.43940433440457  | -0.92572172022267 |
| C | 1.07997638257458  | 1.56846829812403  | -1.14350444015040 |
| H | 2.81775285969809  | 4.51221290167955  | -1.11110757796903 |
| C | -3.98976150352817 | 4.88070679157239  | -0.54393962088803 |
| C | -1.73963884105319 | 4.07709352661973  | -0.80306115791154 |
| C | -3.05592919325381 | 3.71234419608602  | -0.62258370971599 |
| C | -3.61181884717521 | 2.35771610906497  | -0.45506724146509 |
| C | -0.21291906093132 | 2.04159237462412  | -1.01224384419778 |
| O | 1.44614773751974  | 0.26461451467601  | -1.25619794551859 |
| H | -5.94446476793457 | 5.36379647097599  | -0.14567576380972 |
| H | 0.48636530645034  | 5.39357629613297  | -0.91170660990638 |
| H | -5.32873163748147 | 1.33279819651700  | 0.04384685694581  |
| O | -3.66504648475654 | 6.04022230379243  | -0.72395921940238 |
| H | 3.33962367366159  | 1.00543263887364  | -1.34633529098671 |
| O | -2.97658953180634 | 1.30564179199866  | -0.58313227590915 |
| H | -1.66345178644508 | 5.16970725784333  | -0.85010850285577 |
| H | -1.06381760372035 | 1.36856374683198  | -0.97519124549578 |
| H | -0.30264528126680 | -0.59427630256303 | -2.01834317709187 |
| H | 0.92946918646783  | -1.69855086251740 | -1.32546151858291 |
| H | -8.56217684168320 | -8.69335193428508 | 2.15806453649914  |

Coordinates from ORCA-job 2"

|   |                    |                   |                  |
|---|--------------------|-------------------|------------------|
| O | -11.66667677168616 | -5.79406683190984 | 1.70125066819504 |
| H | -11.44282831405292 | -6.67239231027642 | 1.34588551673934 |
| C | -10.59129764500149 | -5.01532604676494 | 1.52934143788963 |
| C | -10.61378869903582 | -3.66996424772680 | 1.90732376495678 |
| C | -9.41675135029388  | -5.56477903161275 | 0.94432835845782 |
| C | -9.47915086637477  | -2.89136180186303 | 1.72616166084989 |
| C | -8.27194374151675  | -4.80160617107720 | 0.80500056701765 |
| C | -8.27923791319098  | -3.43634864040333 | 1.20267246668956 |
| O | -5.38041544556661  | -4.93242953167976 | 0.56190101702198 |



|   |                    |                   |                   |
|---|--------------------|-------------------|-------------------|
| H | -9.50047006877770  | -1.83827090963762 | 2.01497369336372  |
| H | -7.35306304850186  | -5.22114847425631 | 0.40466762677620  |
| C | -7.17432590429952  | -2.52031518895276 | 1.12484729203328  |
| C | -4.98856102685812  | -3.78530102080229 | 0.71139561217140  |
| C | -5.81547040582145  | -2.58115487896511 | 0.90336370871035  |
| N | -3.61126055567784  | -3.55016321631406 | 0.73063292292721  |
| C | -2.94237361875934  | -2.33564086431430 | 0.73787789514886  |
| H | -3.02303059012593  | -4.37298822262212 | 0.62941151961819  |
| O | -1.73188851781966  | -2.26194235842874 | 0.67971619563066  |
| H | -7.47913119096284  | -1.48597038383186 | 1.31891416435007  |
| C | -5.14270357980033  | -1.25359934751058 | 0.93400120575605  |
| N | -3.76829214209537  | -1.23177152427068 | 0.80999202874293  |
| O | -5.76181185545059  | -0.20063485169179 | 1.05295844203130  |
| H | -3.32759081723993  | -0.29720367395590 | 0.73649178445807  |
| H | -11.52952659215676 | -3.25931843655547 | 2.33594742854769  |
| O | -9.56349475781747  | -6.86584270299219 | 0.57139123036355  |
| C | -8.49594431121826  | -7.52041195978347 | -0.11437683012200 |
| C | -8.98416073611531  | -8.88798931641008 | -0.54970239294363 |
| H | -7.62320929857596  | -7.59560671674714 | 0.55808327591415  |
| H | -8.19011396449715  | -6.90851771832829 | -0.98209656906358 |
| H | -9.31692176288672  | -9.47775713256313 | 0.31870169766367  |
| H | -8.17403076449563  | -9.43747943686223 | -1.05287546125036 |
| H | -9.82868458866470  | -8.79978258170424 | -1.25057956799256 |
| H | 2.38592044876291   | -1.32565316388849 | 1.48506322444140  |
| H | 0.35901418419880   | 0.14526401396200  | 1.23364563425010  |
| O | -7.02396050665702  | 3.18217781816460  | 0.50519158986295  |
| C | -5.86819243463686  | 3.33299903852075  | 0.18049978303754  |
| C | 1.50913511669621   | 3.28619619571198  | -2.63424398851644 |
| C | 1.55886186046971   | -1.61691607759847 | 0.81906403721701  |
| C | 0.24904977631418   | 3.81323108598884  | -2.38038326271101 |
| C | 1.92629455325113   | 2.14297074247242  | -1.94732718684791 |
| O | 3.13605754453085   | 1.60944941812169  | -2.16224805008292 |

|   |                   |                   |                   |
|---|-------------------|-------------------|-------------------|
| N | -5.38334101611707 | 4.51319871679935  | -0.36023292042513 |
| N | -4.90699920295924 | 2.34569550848239  | 0.32410042756272  |
| C | 0.75920163514369  | -0.41429120402930 | 0.36976790351189  |
| C | -0.64342807571516 | 3.20472729152921  | -1.46029607269767 |
| C | 1.05956585441085  | 1.53147800608547  | -1.00117092775076 |
| H | 2.19014303778419  | 3.74437452919123  | -3.35350542950898 |
| C | -4.10418357416661 | 4.76039095271797  | -0.84357459683307 |
| C | -1.91042437970728 | 3.87268207547883  | -1.29622280296647 |
| C | -3.12504500467899 | 3.63802604812465  | -0.68942629175135 |
| C | -3.56970628536479 | 2.41058927487856  | -0.00579835124104 |
| C | -0.20781540760813 | 2.03895258745774  | -0.77066108767741 |
| H | 0.89058146812511  | -2.30767936461731 | 1.35304909030577  |
| O | 1.61074453412717  | 0.44329170786070  | -0.40041073778613 |
| H | -6.05738257193470 | 5.26623747813927  | -0.46722951155999 |
| H | -0.06776810946189 | 4.71513766190968  | -2.90863993957518 |
| H | -5.24508292705603 | 1.44752999014223  | 0.71321281193263  |
| O | -3.85175567901147 | 5.83701407865421  | -1.35316912224665 |
| H | 3.20160559483207  | 0.82399273207002  | -1.58947463142169 |
| O | -2.84716653001084 | 1.44662437008818  | 0.26400070596656  |
| H | -1.93119744747257 | 4.84401725958256  | -1.80404344926475 |
| H | -0.88862689572355 | 1.56911154979215  | -0.06746426089062 |
| H | 1.98243508647314  | -2.14714350251142 | -0.04927146922172 |
| H | -0.10056380149918 | -0.72063128846710 | -0.24468347776458 |

Coordinates from ORCA-job 3'

|   |                    |                  |                  |
|---|--------------------|------------------|------------------|
| O | -10.00411945189480 | 9.13537684091468 | 1.03745353603766 |
| H | -9.40203176008028  | 9.89336781933023 | 1.13809291418309 |
| C | -9.24238262619427  | 8.04033382364162 | 0.91400854630695 |
| C | -9.82042234273075  | 6.77529299320334 | 0.77846123014232 |
| C | -7.82830868807175  | 8.16613613602432 | 0.92830957333096 |
| C | -9.00436594769085  | 5.65922069677713 | 0.64305567294456 |
| C | -7.01593184037248  | 7.06052432405407 | 0.76453494979007 |
| C | -7.59156951602147  | 5.77075275648172 | 0.60957097701886 |

|   |                    |                   |                   |
|---|--------------------|-------------------|-------------------|
| O | -4.33240679068559  | 6.21351244135827  | 0.20865179171558  |
| H | -9.45995700505951  | 4.67111812413382  | 0.54616848353455  |
| H | -5.93372117944347  | 7.14873637003903  | 0.73085386337912  |
| C | -6.87261833142919  | 4.53802228759706  | 0.41749995193717  |
| C | -4.37388483165084  | 4.99429939551770  | 0.13867888117527  |
| C | -5.56868329471359  | 4.13860262215696  | 0.23134305986182  |
| N | -3.17321279416033  | 4.30912126839884  | -0.05517858934126 |
| C | -2.97691169643745  | 2.94780314595354  | -0.17985718308310 |
| H | -2.33800650262450  | 4.88419719167852  | -0.12399532973788 |
| O | -1.85531218239050  | 2.48883866479235  | -0.35205507711937 |
| H | -7.53637767937980  | 3.66564877649857  | 0.40292375051624  |
| C | -5.41079230050786  | 2.65575080217332  | 0.07786147294975  |
| N | -4.11059936889229  | 2.18555935366790  | -0.09731753442273 |
| O | -6.33967499797795  | 1.87157156903675  | 0.10301328338087  |
| H | -3.97878236550293  | 1.15895820916720  | -0.16799590564772 |
| H | -10.90876712287056 | 6.69484702860086  | 0.78844783890339  |
| O | -7.39950030147376  | 9.44793853175694  | 1.11014107501738  |
| C | -6.01310157562822  | 9.66991407831352  | 1.30163974226224  |
| H | -5.89329440583259  | 10.73766574390909 | 1.52725535755949  |
| H | -5.43587308346624  | 9.41495377806936  | 0.39725285062870  |
| H | -5.62942594677484  | 9.07106489208323  | 2.14494274801373  |
| O | 1.00894258731984   | 0.04131983627709  | -0.49701219848833 |
| C | 0.06281739720129   | -0.70495516980391 | -0.40074216009280 |
| H | -0.74986982624409  | -7.61194203818839 | -0.26957389153573 |
| N | -1.25063424652539  | -0.27409262989224 | -0.33660964609575 |
| N | 0.20568508816014   | -2.08584856033707 | -0.34453924199781 |
| H | -1.40196347416405  | 0.75149537599531  | -0.36931583926164 |
| C | -2.36733383421478  | -1.07005480540513 | -0.21963402734579 |
| C | -0.77600575229393  | -3.06228973304685 | -0.21719597147411 |
| C | -2.15786480028051  | -2.54666303789412 | -0.13190832110902 |
| H | 1.16091095537958   | -2.42749376586781 | -0.40409059557098 |
| C | -5.08608874359417  | -4.92080490278792 | 0.26746480787898  |

|   |                   |                   |                   |
|---|-------------------|-------------------|-------------------|
| C | -5.56888197701376 | -6.21330309806855 | 0.44236405894862  |
| C | -3.32277513961218 | -3.27005419826815 | 0.01548480999829  |
| O | -3.48387631779520 | -0.55741504287654 | -0.17814891989195 |
| C | -3.69592451264269 | -4.64854031322244 | 0.19925583385303  |
| C | -4.67031909470957 | -7.27581939764873 | 0.57582472058858  |
| O | -0.42218277922473 | -4.23349491497586 | -0.19187537421978 |
| C | -2.79409374191841 | -5.73582496376209 | 0.34110447488506  |
| O | -5.09837033753333 | -8.53607309217288 | 0.73885142592064  |
| C | -3.27554129917565 | -7.01430324121878 | 0.54154948853595  |
| H | -5.79390863184590 | -4.09425089246577 | 0.17382141999607  |
| H | -6.63880505416850 | -6.42461618355688 | 0.48333960932456  |
| H | -4.18947909110435 | -2.59953549214867 | 0.00306119478123  |
| C | -1.10475221760281 | -7.98553971757322 | 0.70585278431946  |
| O | -2.51324995024199 | -8.12870121216437 | 0.71839689122425  |
| H | -4.30676235053032 | -9.09705878116155 | 0.81651697494694  |
| H | -1.72940920542352 | -5.53014384949808 | 0.27533905946803  |
| H | -0.68545578589633 | -8.98159701287535 | 0.89647501345368  |
| H | -0.76905193434347 | -7.28802883072142 | 1.49106168772235  |

Coordinates from ORCA-job 3"

|   |                   |                   |                  |
|---|-------------------|-------------------|------------------|
| O | -9.98693879196368 | 9.28371270060252  | 1.22160106246922 |
| H | -9.39396019703098 | 10.04411953795811 | 1.08619859459229 |
| C | -9.24291066752375 | 8.17933478330860  | 1.07693138021990 |
| C | -9.81641208634111 | 6.90937676399235  | 1.16997478209475 |
| C | -7.85351163070474 | 8.30467256231887  | 0.80996829396781 |
| C | -9.01234047103712 | 5.78467395205997  | 1.03942865730034 |
| C | -7.04538055463682 | 7.18637480014616  | 0.71575938654265 |
| C | -7.61312040327843 | 5.88768371291905  | 0.83446857798463 |
| O | -4.32995010962863 | 6.23693691411924  | 0.68503710344582 |
| H | -9.46458171374473 | 4.79289342982380  | 1.10919633406895 |
| H | -5.97376045367909 | 7.27045750561775  | 0.55527369604104 |
| C | -6.90920720029091 | 4.63193443560383  | 0.77159811624397 |
| C | -4.38987952736828 | 5.01745967553924  | 0.71254079941074 |

|   |                    |                   |                  |
|---|--------------------|-------------------|------------------|
| C | -5.60701696291117  | 4.19115047631587  | 0.71413316055979 |
| N | -3.19383907977268  | 4.29959231845796  | 0.75310681710800 |
| C | -3.02070494097816  | 2.92940944553549  | 0.75553166998932 |
| H | -2.34040120047753  | 4.85159761377050  | 0.76313640126027 |
| O | -1.90114503487985  | 2.44064683857625  | 0.78255458079202 |
| H | -7.59097641885832  | 3.77400654092467  | 0.79650327369485 |
| C | -5.47402405382384  | 2.69737379252265  | 0.69721661363497 |
| N | -4.17467952780431  | 2.19167193639476  | 0.72146482765923 |
| O | -6.42111328665840  | 1.93594505609401  | 0.67009377029230 |
| H | -4.04984260963829  | 1.16463623312711  | 0.71578922794527 |
| H | -10.89057790309947 | 6.83269976720461  | 1.34638517554315 |
| O | -7.45307363762989  | 9.59979436693440  | 0.67093265352692 |
| C | -6.16424139931318  | 9.88291181770439  | 0.12462946988352 |
| O | 1.07098297217373   | 0.05610917619648  | 0.56765154953186 |
| C | 0.12762584401395   | -0.70026854573775 | 0.54537380388547 |
| N | -1.19140666370731  | -0.28826115108348 | 0.62012327453756 |
| N | 0.28343107954106   | -2.07741785003385 | 0.44244988991616 |
| H | -1.36040102996429  | 0.73023522431032  | 0.70373948662342 |
| C | -2.30673702540478  | -1.09684640463106 | 0.60699767842723 |
| C | -0.69368581208720  | -3.06559514152218 | 0.39755639277542 |
| C | -2.08229970651434  | -2.56988218685552 | 0.47600874645831 |
| H | 1.24435505224636   | -2.40361339673474 | 0.38827488035422 |
| C | -5.00173701189398  | -4.97361510191172 | 0.43790706121947 |
| C | -5.50154818020450  | -6.27014842233891 | 0.42154397046874 |
| C | -3.23916377535531  | -3.31737051462813 | 0.45173246823746 |
| O | -3.42613464685712  | -0.59837475815821 | 0.70054411576863 |
| C | -3.60984104834946  | -4.70819147447610 | 0.37682363724458 |
| C | -4.61703082175431  | -7.34836810864594 | 0.33720836419312 |
| O | -0.33424321035827  | -4.23100628789633 | 0.29846913059058 |
| C | -2.72144525645878  | -5.81374896686586 | 0.27023576166037 |
| O | -5.05891820814445  | -8.61349741364054 | 0.33289030258510 |
| C | -3.22130967713756  | -7.10187405156493 | 0.24486044763836 |

|   |                   |                    |                   |
|---|-------------------|--------------------|-------------------|
| H | -5.69733705704587 | -4.13455343710299  | 0.50755532965015  |
| H | -6.57252759026139 | -6.47283647137937  | 0.47382588890707  |
| H | -4.11236888539567 | -2.65954503974693  | 0.52640858421438  |
| C | -1.10788131977764 | -8.16408662838350  | -0.21811321340193 |
| O | -2.48791333682996 | -8.24487521976918  | 0.13644218708719  |
| H | -4.27413148462329 | -9.18402848687857  | 0.24953768317054  |
| H | -1.65466312163468 | -5.61419784419734  | 0.21606164410171  |
| C | -0.62168143023555 | -9.57198521567621  | -0.49952905901665 |
| H | -0.54108456815023 | -7.69419416590807  | 0.60482774481559  |
| H | -0.99608566952107 | -7.51395947874600  | -1.10448282840613 |
| H | -0.72257137452049 | -10.20708830252599 | 0.39428435126987  |
| H | 0.43723277436950  | -9.55810889269843  | -0.80101240581813 |
| H | -1.20572040264005 | -10.02745806808027 | -1.31416561697749 |
| C | -6.15564161906076 | 11.33405671539839  | -0.31421532103272 |
| H | -5.97096750017393 | 9.20737825850117   | -0.72755452369041 |
| H | -5.38965307316720 | 9.68010206776554   | 0.88523063323032  |
| H | -6.92097183195101 | 11.51102286980983  | -1.08542900367978 |
| H | -5.17404614597182 | 11.60189867040033  | -0.73529254630174 |
| H | -6.36527937411788 | 12.00108706786376  | 0.53650508349028  |

Coordinates from ORCA-job 4'

|   |                   |                  |                  |
|---|-------------------|------------------|------------------|
| O | -5.42780127624762 | 5.00338489392615 | 2.11791885399323 |
| H | -5.44926635434755 | 5.81878681354026 | 1.58589298128853 |
| C | -4.15551896353050 | 4.57811231453127 | 2.14354587681298 |
| C | -3.79515651248952 | 3.42474808615929 | 2.84374681138238 |
| C | -3.16905678537226 | 5.30089557446666 | 1.42569981303897 |
| C | -2.47650036120743 | 2.98914280423134 | 2.81080728072587 |
| C | -1.85488416740047 | 4.87576019668720 | 1.40000057304646 |
| C | -1.47785141844873 | 3.69323850014695 | 2.09078653241508 |
| O | 0.78219499610417  | 5.46974545527865 | 0.43625617258425 |
| H | -2.20097118024897 | 2.07731569702718 | 3.34457618657659 |
| H | -1.09222851099240 | 5.41428025227526 | 0.84526629102747 |
| C | -0.16559873638488 | 3.10055985797622 | 2.10306787360554 |

|   |                   |                  |                   |
|---|-------------------|------------------|-------------------|
| C | 1.48727705407842  | 4.53118834291356 | 0.77360895969849  |
| C | 1.07640689776491  | 3.35717105507331 | 1.56758236250267  |
| N | 2.82750429714440  | 4.55314856274389 | 0.39079569498892  |
| C | 3.81811206115316  | 3.62101602579686 | 0.64641119397198  |
| H | 3.11582263455361  | 5.36325488415305 | -0.15014440557600 |
| O | 4.96840527073157  | 3.76309710141684 | 0.30274906345097  |
| H | -0.13927253449382 | 2.16550898650744 | 2.67365585634933  |
| C | 2.08408614257456  | 2.28985233068197 | 1.84605555686048  |
| N | 3.36074517501812  | 2.50987286341596 | 1.33880136150293  |
| O | 1.85523266412324  | 1.26760284624665 | 2.46931195987609  |
| H | 4.05782768625279  | 1.80363177759511 | 1.55851937793994  |
| H | -4.56714249195420 | 2.88109658779138 | 3.39024406963736  |
| O | -3.67212384294388 | 6.38730845281213 | 0.77627838434249  |
| C | -2.78319661091730 | 7.23409758211680 | 0.06436660014803  |
| H | -2.18053709596392 | 6.65831031997674 | -0.65339649798850 |
| H | -2.10617081533760 | 7.75990363219762 | 0.75873360973309  |
| H | -0.63852501347158 | 0.73741082511303 | 0.76675707929068  |
| O | -7.78905044674317 | 3.62991502022284 | -0.18952653379842 |
| C | -6.63875099972293 | 3.77258979131865 | -0.53290736668445 |
| C | 0.97404887153889  | 3.97088306951683 | -2.73175476370663 |
| C | -0.34461101873162 | 4.40641512363330 | -2.69806836284973 |
| C | 1.33493740506212  | 2.81766404704062 | -2.03157054594739 |
| O | 2.60721433263829  | 2.39234424194837 | -2.00691120309563 |
| N | -6.18168255654613 | 4.88419034481235 | -1.22477356945147 |
| N | -5.64786086483490 | 2.84068414969531 | -0.27756187527181 |
| C | -0.03608284368212 | 0.16183403928266 | 0.04864591113010  |
| C | -1.34279921279007 | 3.70234063138555 | -1.97738280723096 |
| C | 0.34899468377250  | 2.09505081077570 | -1.31284470812465 |
| H | 1.74563736055884  | 4.51444230749483 | -3.27890594165161 |
| C | -4.90499678082618 | 5.10495583377882 | -1.73163259470611 |
| C | -2.65516422994794 | 4.29479432047697 | -1.98919941431318 |
| C | -3.89703001810794 | 4.03780448372809 | -1.45357218419317 |

|   |                   |                   |                   |
|---|-------------------|-------------------|-------------------|
| C | -4.30751965329514 | 2.86343910046890  | -0.65991190959130 |
| C | -0.96521261673970 | 2.52005271003861  | -1.28650143662287 |
| O | 0.85254135222279  | 1.00886217271069  | -0.66338186426954 |
| H | -6.87896546281113 | 5.59033794003602  | -1.44415419956358 |
| H | -0.62052481927654 | 5.31811177758083  | -3.23186360877088 |
| H | -5.93595551686629 | 2.03029644729925  | 0.26307646409861  |
| O | -4.67635513992377 | 6.12766689280846  | -2.35421646370941 |
| H | 2.62910683979843  | 1.57705185613338  | -1.47473782306729 |
| O | -3.60202328450199 | 1.92522397111035  | -0.32247704489900 |
| H | -2.68177745961471 | 5.22995419382062  | -2.55959514037137 |
| H | -1.72749109058800 | 1.98154634657375  | -0.73123919218406 |
| H | -0.71330114865863 | -0.36386658021257 | -0.64561052331096 |
| H | 0.58858427150961  | -0.55255172215660 | 0.59729006877503  |
| H | -3.40764216063883 | 7.94839405587846  | -0.48464683984458 |

Coordinates from ORCA-job 4"

|   |                   |                  |                   |
|---|-------------------|------------------|-------------------|
| O | -5.44027881491194 | 5.03056666877940 | 2.09511697043884  |
| H | -5.45935430088214 | 5.84759456470630 | 1.56523447545826  |
| C | -4.16888484278083 | 4.60284042400975 | 2.11840230576762  |
| C | -3.80883113481699 | 3.45035656175166 | 2.82079784525395  |
| C | -3.18375596932604 | 5.32461002260648 | 1.39714399620933  |
| C | -2.48970506132363 | 3.01631983016045 | 2.79137768569390  |
| C | -1.87021781672214 | 4.89670154786216 | 1.37034418659281  |
| C | -1.49207918335516 | 3.72046502406557 | 2.07011131405354  |
| O | 0.76900504670883  | 5.50085800062135 | 0.40253347429200  |
| H | -2.21226772443969 | 2.10762297880270 | 3.32941943458581  |
| H | -1.10814664325560 | 5.42972469859286 | 0.80991755513297  |
| C | -0.17464803073899 | 3.14385517961765 | 2.10065323101457  |
| C | 1.47499603541408  | 4.56826368176233 | 0.75386130568698  |
| C | 1.06967403916898  | 3.41078415136796 | 1.57416130748196  |
| N | 2.81229167161874  | 4.57930832298864 | 0.35744028792591  |
| C | 3.80845937333123  | 3.66122664119150 | 0.63995806191070  |
| H | 3.09533137330688  | 5.37561130814372 | -0.20625235376224 |



|   |                   |                   |                   |
|---|-------------------|-------------------|-------------------|
| O | 4.95701535539758  | 3.79582177421292  | 0.28772013053952  |
| H | -0.14019432889253 | 2.21868354427684  | 2.68681905022042  |
| C | 2.08856297034753  | 2.37051819994116  | 1.89883622298352  |
| N | 3.35978420733743  | 2.57348828474628  | 1.37480571233859  |
| O | 1.87014190464884  | 1.37944094285727  | 2.57545303457469  |
| H | 4.06317727675442  | 1.88330287493214  | 1.62342157997233  |
| H | -4.58059282607940 | 2.90830640010083  | 3.36924266798628  |
| O | -3.68045896232108 | 6.41569669805243  | 0.75401599818648  |
| C | -2.76766576562302 | 7.29907996084108  | 0.09440287365940  |
| C | -3.55498534621354 | 8.45085686239635  | -0.48980703297857 |
| H | -2.23104237521487 | 6.74084612982457  | -0.69028691418424 |
| H | -2.01756497523723 | 7.64222179692763  | 0.82837953100176  |
| H | -4.27638791779528 | 8.08085796863097  | -1.23206197987252 |
| H | -2.86879329464274 | 9.15103873924454  | -0.99159326694073 |
| H | -4.09061862508481 | 8.99946903420924  | 0.30139977982173  |
| H | 1.44955598495803  | -0.68690993966129 | 1.34839010619357  |
| H | -0.59636486818693 | 0.65190415952794  | 0.80383765747807  |
| O | -7.78174586152286 | 3.59966940425163  | -0.17234214542441 |
| C | -6.63322139151721 | 3.73377807271023  | -0.52486098593080 |
| C | 0.98448790095470  | 3.94304626344439  | -2.70451840353498 |
| C | 0.72888093460327  | -1.05759188931363 | 0.60575962956463  |
| C | -0.33465007085053 | 4.37708454188526  | -2.67577331626841 |
| C | 1.34411059654235  | 2.79039117100484  | -2.00219450979228 |
| O | 2.61550289825677  | 2.36267812018740  | -1.97822136056813 |
| N | -6.18443295201716 | 4.82087684401434  | -1.26055883445169 |
| N | -5.63718954949545 | 2.81570645978374  | -0.24184476397628 |
| C | -0.05828989910424 | 0.09358576278566  | 0.02020348073890  |
| C | -1.33269050582314 | 3.67282297365333  | -1.95517186870465 |
| C | 0.35854134084123  | 2.06839950971162  | -1.28177165826895 |
| H | 1.75654839587583  | 4.48517497581656  | -3.25245986917806 |
| C | -4.91313442014811 | 5.02339927375998  | -1.78459508805467 |
| C | -2.65006307651833 | 4.24954284407201  | -1.98609320271512 |

|   |                   |                   |                   |
|---|-------------------|-------------------|-------------------|
| C | -3.89447593823228 | 3.98297920950322  | -1.45960943632429 |
| C | -4.30004093927832 | 2.82598869982465  | -0.63874973086327 |
| C | -0.95500605325441 | 2.49631848397506  | -1.25561847643778 |
| H | 0.04247453145640  | -1.75774271475682 | 1.10730765383366  |
| O | 0.85486687925747  | 0.97716561689422  | -0.63862530411942 |
| H | -6.88766673135170 | 5.51109635245125  | -1.50948727954924 |
| H | -0.61171766466545 | 5.28593629474249  | -3.21374479870833 |
| H | -5.92033550502768 | 2.01980432394608  | 0.32234834848015  |
| O | -4.69444888221421 | 6.01424256101003  | -2.46148137971849 |
| H | 2.63429801266177  | 1.54552499016660  | -1.44850017690854 |
| O | -3.59434567594906 | 1.89322271496707  | -0.28722836227102 |
| H | -2.68427352234427 | 5.17455375374798  | -2.57251392960585 |
| H | -1.71741073003488 | 1.96317323942834  | -0.69578427407174 |
| H | 1.26538515398985  | -1.60645820482506 | -0.18466370158297 |
| H | -0.80730370623785 | -0.25024268693507 | -0.71458249030522 |

Coordinates from ORCA-job 5'

|   |                   |                   |                  |
|---|-------------------|-------------------|------------------|
| O | 2.35384430422268  | -4.51373442991861 | 3.95988557013763 |
| H | 1.94421905372759  | -5.39695849978992 | 3.98590464145761 |
| C | 3.63546611115159  | -4.65688875785691 | 3.59081451834468 |
| C | 4.45757366130090  | -3.54147155940797 | 3.41044017701314 |
| C | 4.16026337893778  | -5.95435104438016 | 3.35449834633466 |
| C | 5.77308005907968  | -3.71565640897832 | 3.00043478417238 |
| C | 5.46921565166969  | -6.12972889271459 | 2.94242769754687 |
| C | 6.31314017127560  | -5.00355409880489 | 2.75190571141796 |
| O | 7.39992409474039  | -8.05334352082207 | 2.04195120000836 |
| H | 6.40295825557490  | -2.83672471658507 | 2.84924170200041 |
| H | 5.87195999086330  | -7.11616728461335 | 2.73109033094204 |
| C | 7.68444638888023  | -5.02876376672979 | 2.30814487426482 |
| C | 8.40605479451612  | -7.41694636632562 | 1.75947689024882 |
| C | 8.60718493902646  | -5.96463605112241 | 1.89588146504986 |
| N | 9.48486160884426  | -8.11942344268638 | 1.22237777354094 |
| C | 10.65686843848986 | -7.61265582431234 | 0.68857916058629 |

|   |                   |                   |                   |
|---|-------------------|-------------------|-------------------|
| H | 9.32541921650117  | -9.10882432134669 | 1.05815222607526  |
| O | 11.43333734070588 | -8.29159316104099 | 0.05110931983003  |
| H | 8.12551953031514  | -4.02655611409840 | 2.26847355317485  |
| C | 9.92295249644103  | -5.37844451187788 | 1.49165558004002  |
| N | 10.84838773135025 | -6.27204635734700 | 0.95185541227943  |
| O | 10.21251286698424 | -4.19968683827817 | 1.57561045911634  |
| H | 11.68502443835252 | -5.85695116972229 | 0.55114362548154  |
| H | 4.03767512335178  | -2.54919191332927 | 3.57973504446787  |
| O | 3.25043359768002  | -6.94737409093671 | 3.55718421498974  |
| C | 3.65826219864007  | -8.28955580081986 | 3.34010743440430  |
| H | 2.79100985565779  | -8.91980389330109 | 3.57403483624539  |
| H | 4.49630311753243  | -8.55912346489530 | 4.00403286607794  |
| H | 3.97009718721727  | -8.44516333684422 | 2.29387940874864  |
| O | 0.38817171170665  | -5.86506119327816 | 1.67767359227843  |
| C | 1.43128925465583  | -5.58200763074814 | 1.12868061574433  |
| H | 7.22285696802440  | -9.12234859329367 | -0.49619941905718 |
| N | 1.86119416876299  | -4.28490660113320 | 0.93404532131707  |
| N | 2.30763371485130  | -6.53542234183445 | 0.63761680888521  |
| H | 1.25805751952505  | -3.55754478423922 | 1.30740700732989  |
| C | 3.08478933930019  | -3.86552561479490 | 0.41953780127628  |
| C | 3.59407169060946  | -6.35202720773767 | 0.12916761984751  |
| C | 4.02714219630050  | -4.95054921096878 | 0.00958308234825  |
| H | 2.01480674382116  | -7.50031424739100 | 0.75755445308730  |
| C | 7.53061664749259  | -4.06231502210483 | -1.07401866310680 |
| C | 8.80359729974415  | -4.43355252954392 | -1.48306823197502 |
| C | 5.25389720369252  | -4.48194575609395 | -0.39963636518441 |
| O | 3.33231007906219  | -2.67573201570404 | 0.35523283274183  |
| C | 6.51022638448974  | -5.02054621237291 | -0.85037733123714 |
| C | 9.09336219890259  | -5.78293177117152 | -1.69588216235477 |
| O | 4.24268930177606  | -7.35072028237691 | -0.15207963587772 |
| C | 6.81392619885743  | -6.38980409889910 | -1.07067241147344 |
| O | 10.32306315403674 | -6.16546037944401 | -2.06542441460765 |

|   |                   |                    |                   |
|---|-------------------|--------------------|-------------------|
| C | 8.08031423785990  | -6.75664391964891  | -1.49127481386807 |
| H | 7.31043729503223  | -3.00609737986545  | -0.90639075803630 |
| H | 9.59608332434864  | -3.69860919257177  | -1.62851159292753 |
| H | 5.26882012143927  | -3.38754955101249  | -0.34957311813274 |
| C | 7.60262899349071  | -9.10045560135803  | -1.53180616150191 |
| O | 8.50754532451523  | -8.02750114923223  | -1.72622825434182 |
| H | 10.35191126609046 | -7.13875045806422  | -2.09183318066972 |
| H | 6.03941718076594  | -7.12756531059067  | -0.87969817968717 |
| H | 8.16684484455766  | -10.01739000515551 | -1.74748729328054 |
| H | 6.74459003325604  | -9.02322230048243  | -2.22023597153427 |

Coordinates from ORCA-job 5"

|   |                   |                   |                   |
|---|-------------------|-------------------|-------------------|
| O | 2.46560653766174  | -4.59632964521036 | 4.05848956306289  |
| H | 2.05696649007112  | -5.48019354231941 | 4.06536848590114  |
| C | 3.74104353823397  | -4.72781250193875 | 3.66301720740764  |
| C | 4.56320335629952  | -3.60655305229976 | 3.51395831460560  |
| C | 4.25540878394352  | -6.01455707760617 | 3.35993846336558  |
| C | 5.86886742357382  | -3.76313197471882 | 3.06642651241557  |
| C | 5.55956646262906  | -6.17184127702676 | 2.92865661171859  |
| C | 6.40055470008046  | -5.04203253728875 | 2.75944109152852  |
| O | 7.44854622424387  | -8.09143637662963 | 2.01144442233931  |
| H | 6.49500350551090  | -2.87898795755427 | 2.93053522464418  |
| H | 5.95820671989610  | -7.14984190043090 | 2.68065835180988  |
| C | 7.75328767177513  | -5.06304080225123 | 2.26372381029008  |
| C | 8.44008384070185  | -7.45387067271347 | 1.68063910322742  |
| C | 8.65020983064876  | -6.00256752716576 | 1.80213891041994  |
| N | 9.48867703551598  | -8.16269890733333 | 1.09826595500354  |
| C | 10.62761443879353 | -7.66373810124676 | 0.49111377925852  |
| H | 9.32150119167932  | -9.15535372074364 | 0.96427854444866  |
| O | 11.36377290195888 | -8.35257845412627 | -0.18347930144234 |
| H | 8.19639072885756  | -4.06233389253263 | 2.21215921934448  |
| C | 9.94444566963517  | -5.42344242535193 | 1.32500644067040  |
| N | 10.83242819010062 | -6.32078666841310 | 0.72743752045863  |

|   |                   |                   |                   |
|---|-------------------|-------------------|-------------------|
| O | 10.24463634621888 | -4.24668050016500 | 1.39385441532219  |
| H | 11.64561813832773 | -5.90900433867328 | 0.27796387740280  |
| H | 4.14832085150736  | -2.62202595956612 | 3.73349063136559  |
| O | 3.34990629271520  | -7.01830303988690 | 3.51078591121412  |
| C | 3.74884963760191  | -8.34636925576006 | 3.15200398630069  |
| O | 0.29572426955314  | -5.68590680502019 | 1.82598575411630  |
| C | 1.33896700152078  | -5.42014543166504 | 1.26874454484926  |
| N | 1.80666608300611  | -4.13357219509475 | 1.09233643118789  |
| N | 2.17847766840492  | -6.39022210664698 | 0.74764585299151  |
| H | 1.23202747642075  | -3.39433334433287 | 1.48655889385754  |
| C | 3.04065560135614  | -3.74480697103494 | 0.57647585724709  |
| C | 3.46500596012111  | -6.23934596675683 | 0.23442253239193  |
| C | 3.94200249760117  | -4.85190469481057 | 0.13404015235613  |
| H | 1.86032507261115  | -7.34779122105615 | 0.86063291159929  |
| C | 7.42245310080897  | -4.06042886618533 | -1.09245871210659 |
| C | 8.65516147228977  | -4.46555868736130 | -1.58436485936370 |
| C | 5.17381543361347  | -4.41713473691613 | -0.29813779795360 |
| O | 3.32687628837046  | -2.56269313482005 | 0.53313490384066  |
| C | 6.39258833210042  | -4.99105683612913 | -0.80410730098180 |
| C | 8.89487219306439  | -5.82272325008108 | -1.80875305473232 |
| O | 4.07951787951027  | -7.25574988410803 | -0.06377157608242 |
| C | 6.64903481657420  | -6.36936248914564 | -1.02848552554715 |
| O | 10.08559585628087 | -6.24083405554976 | -2.25853226025029 |
| C | 7.87706602751388  | -6.77107101447036 | -1.52317404560608 |
| H | 7.24191628527013  | -2.99879238949901 | -0.91222142071735 |
| H | 9.45558596481903  | -3.75213212619906 | -1.78348910429668 |
| H | 5.22762610187583  | -3.32494201304566 | -0.23102612138914 |
| C | 7.41073902964828  | -9.12860132186237 | -1.36600943543504 |
| O | 8.26182947426483  | -8.05227202247255 | -1.76292929702544 |
| H | 10.08323075814982 | -7.21496485067307 | -2.27671655157815 |
| H | 5.86968417208157  | -7.08639135405619 | -0.78706215217957 |
| C | 2.55041089293545  | -9.25885560790454 | 3.28203385689975  |

|   |                  |                    |                   |
|---|------------------|--------------------|-------------------|
| H | 4.57279525133203 | -8.66541062038150  | 3.81381412010632  |
| H | 4.13055867840530 | -8.34107111701152  | 2.11792752093171  |
| H | 2.18228817703758 | -9.29877740447962  | 4.31869561125642  |
| H | 2.83046668304966 | -10.27675878984234 | 2.96849997692394  |
| H | 1.72153955825838 | -8.91447141706404  | 2.64396517111300  |
| C | 8.18654058576870 | -10.41660736979188 | -1.55123471051511 |
| H | 6.49461003231986 | -9.11475007229876  | -1.98213499545470 |
| H | 7.10542269827125 | -8.98651674440275  | -0.31542514823094 |
| H | 8.44020908520499 | -10.57828258677229 | -2.61029797535672 |
| H | 7.59051641228945 | -11.27207351673380 | -1.19851143747893 |
| H | 9.13240062011317 | -10.38613487537007 | -0.98746766147076 |

Coordinates from ORCA-job 6'

|   |                  |                   |                  |
|---|------------------|-------------------|------------------|
| O | 6.61233133584333 | 0.03156826333957  | 0.14305497580256 |
| H | 7.35550732340998 | -0.38464171630293 | 0.61531883446095 |
| C | 5.49846352851083 | -0.59805826657667 | 0.54094264314418 |
| C | 4.24540659604417 | -0.24402792863190 | 0.03548340900944 |
| C | 5.60220338843423 | -1.65460646280305 | 1.48372614286881 |
| C | 3.12148339894102 | -0.95666550444050 | 0.43515318787317 |
| C | 4.49085575346679 | -2.37757842422312 | 1.86984754647751 |
| C | 3.21743152163935 | -2.05300810070932 | 1.33112492314399 |
| O | 3.65744582094968 | -4.91183815323757 | 2.97096970884779 |
| H | 2.15099037195426 | -0.70460693758900 | 0.00293441629587 |
| H | 4.56572733773968 | -3.22243836449388 | 2.54779947820244 |
| C | 1.99906921454950 | -2.78870711701732 | 1.53303633588927 |
| C | 2.47332966394427 | -5.02980084978237 | 2.67657963579750 |
| C | 1.61658621659294 | -4.00497386594195 | 2.05657814334552 |
| N | 1.85486421143756 | -6.24855728981087 | 2.93778304762286 |
| C | 0.55283534755153 | -6.63360438138750 | 2.66012109813696 |
| H | 2.45304351799554 | -6.97902863374254 | 3.31226333946660 |
| O | 0.14228019710726 | -7.75682988860696 | 2.84410386937911 |
| H | 1.13485414614855 | -2.28594804097299 | 1.08568086715327 |
| C | 0.17643613576391 | -4.32063914921838 | 1.82481856592803 |

|   |                   |                   |                   |
|---|-------------------|-------------------|-------------------|
| N | -0.23198283625889 | -5.60495370098377 | 2.16726572950031  |
| O | -0.62519472525474 | -3.54942853780749 | 1.32602832998481  |
| H | -1.19963476981228 | -5.83812401896371 | 1.95793907647614  |
| H | 4.17832122371605  | 0.57297811228419  | -0.68472314250183 |
| O | 6.88107118083644  | -1.86841680178350 | 1.90100415237457  |
| C | 7.11508719446607  | -2.86162963152036 | 2.88338436427156  |
| H | 8.18502670692841  | -2.81603536469004 | 3.12309414644157  |
| H | 6.86648499698751  | -3.86475634674950 | 2.50241106304027  |
| H | 6.52464977985004  | -2.66150766031878 | 3.79329642654709  |
| O | -1.87886388092483 | -5.39717996828536 | -1.52486071685636 |
| C | -0.74044290402405 | -4.99069806783825 | -1.51052242788143 |
| H | 5.16925104662871  | -6.39158793999692 | 2.14173541980920  |
| N | -0.36270930547943 | -3.74261285732454 | -1.97170588273116 |
| N | 0.31895342968020  | -5.74639666007416 | -1.02608900562990 |
| H | -1.11915533439167 | -3.13333172654595 | -2.27004780091839 |
| C | 0.90602422530397  | -3.18011992812782 | -1.93407115102002 |
| C | 1.64759730213652  | -5.37011267317946 | -0.85790013776033 |
| C | 1.99934897193411  | -4.05905579098548 | -1.42347850290391 |
| H | 0.06965848805477  | -6.65940071446372 | -0.65522377085918 |
| C | 5.60207473996332  | -2.95419109315122 | -1.65912816970559 |
| C | 6.93642746501180  | -3.09717615671883 | -1.30050253751131 |
| C | 3.25433696137157  | -3.51040646637952 | -1.55929748627522 |
| O | 1.07361982499240  | -2.02745954294822 | -2.29608687989070 |
| C | 4.60134129325606  | -3.83202299432935 | -1.17401255321338 |
| C | 7.30074645551375  | -4.11185851364232 | -0.41257617608950 |
| O | 2.39195029058527  | -6.14228719585427 | -0.26640824543730 |
| C | 4.98790901493156  | -4.87391483696146 | -0.29061547204003 |
| O | 8.57034364509568  | -4.25884969985216 | -0.00434597518141 |
| C | 6.31139675579231  | -4.99847793459064 | 0.08498377107265  |
| H | 5.31144891305689  | -2.13698943677049 | -2.32136837570005 |
| H | 7.70427021022218  | -2.41788599565711 | -1.67254936183789 |
| H | 3.19294116896652  | -2.55545961604889 | -2.09032751791303 |

|   |                  |                   |                  |
|---|------------------|-------------------|------------------|
| C | 5.92113796603177 | -6.88530566542029 | 1.50648366372477 |
| O | 6.81239656491296 | -5.92352284840810 | 0.95397353731114 |
| H | 8.59038029949851 | -5.04052006525491 | 0.57559668101608 |
| H | 4.22345102708091 | -5.54546286601281 | 0.08725924076688 |
| H | 6.53815223731674 | -7.56570689627541 | 2.10801465881244 |
| H | 5.41401934799710 | -7.45590108621865 | 0.71008085986239 |

Coordinates from ORCA-job 6"

|   |                   |                   |                   |
|---|-------------------|-------------------|-------------------|
| O | 6.74496555971536  | -0.05869550300725 | 0.38167234999165  |
| H | 7.45994614563646  | -0.51600995440768 | 0.85973519011699  |
| C | 5.60019240122477  | -0.66420158432057 | 0.72707668202016  |
| C | 4.37425922248447  | -0.25772693822462 | 0.19330996452124  |
| C | 5.64361125540687  | -1.75033323292478 | 1.64053118933855  |
| C | 3.21673470039166  | -0.94711809889290 | 0.53447931625028  |
| C | 4.49453601984593  | -2.43395555256948 | 1.98547401678195  |
| C | 3.25014840415054  | -2.06168774231173 | 1.41240562513959  |
| O | 3.56659737837566  | -4.92725021354830 | 3.06986445368522  |
| H | 2.26921943897638  | -0.65952369069053 | 0.07362958118840  |
| H | 4.51799819977752  | -3.28962387696615 | 2.65227358648091  |
| C | 2.01077725821802  | -2.77627625024198 | 1.55418747544139  |
| C | 2.39015158255111  | -5.01732398831348 | 2.73694570763316  |
| C | 1.58426420076670  | -3.98563050579908 | 2.06069268643965  |
| N | 1.72782377083659  | -6.21025352666447 | 3.01210253767009  |
| C | 0.43923929087057  | -6.58155548629425 | 2.66561497929591  |
| H | 2.29478758320668  | -6.94408081237304 | 3.42656686678442  |
| O | -0.00202076877091 | -7.69279285517671 | 2.85182606265691  |
| H | 1.17936385793748  | -2.26253369479425 | 1.05987756512405  |
| C | 0.16097656983179  | -4.29232324303180 | 1.73399982244454  |
| N | -0.29504249199599 | -5.55453861409813 | 2.09645697756066  |
| O | -0.58745827722807 | -3.53539524943319 | 1.13824872143988  |
| H | -1.24841884506307 | -5.78098171735822 | 1.82415956823008  |
| H | 4.35665739276831  | 0.57950852893662  | -0.50641058221290 |
| O | 6.90229678553775  | -2.03674547338209 | 2.07130747757744  |



|   |                   |                   |                   |
|---|-------------------|-------------------|-------------------|
| C | 7.07849693032703  | -3.07876102069126 | 3.03129225702833  |
| O | -1.83507756708778 | -5.51827294430189 | -1.74118446012263 |
| C | -0.71052678236199 | -5.08344811402876 | -1.65030631215844 |
| N | -0.33343659162905 | -3.83165432804526 | -2.09942515737400 |
| N | 0.32926348206329  | -5.80756886836220 | -1.07967737133227 |
| H | -1.08313280391478 | -3.24404655327763 | -2.45310145131418 |
| C | 0.91139866839040  | -3.23130577951588 | -1.96423082834640 |
| C | 1.63045906259456  | -5.39247710816256 | -0.81628728537210 |
| C | 1.99179574201685  | -4.08468998581459 | -1.38391756957464 |
| H | 0.07148898903177  | -6.71591852598381 | -0.70292730846261 |
| C | 5.59164767393342  | -2.97434246556878 | -1.56845820024998 |
| C | 6.93118962256469  | -3.14184915989942 | -1.23920559673516 |
| C | 3.24389093225371  | -3.52298096343134 | -1.47700260581477 |
| O | 1.07437584070937  | -2.07547337468805 | -2.31539454145916 |
| C | 4.58767171136891  | -3.84343873678558 | -1.07570635396932 |
| C | 7.29646773643975  | -4.17623411070695 | -0.37681707732232 |
| O | 2.34481138876007  | -6.12555155441590 | -0.14272925367346 |
| C | 4.97162010269311  | -4.89124699679882 | -0.19795556542178 |
| O | 8.57697996770721  | -4.36889981093657 | -0.01717052393101 |
| C | 6.30170338831187  | -5.04102567243524 | 0.14712441263069  |
| H | 5.30078832014849  | -2.15005011571954 | -2.22158925695400 |
| H | 7.70235546666626  | -2.47294277813407 | -1.62282582922599 |
| H | 3.18898202746757  | -2.56855363738726 | -2.00998049966313 |
| C | 5.92267934838954  | -6.91336638842712 | 1.61672274637779  |
| O | 6.81025871094870  | -5.97493085307785 | 0.99925695287242  |
| H | 8.59045550975467  | -5.15726905402809 | 0.55456164692857  |
| H | 4.20271888954562  | -5.54747351813186 | 0.19767340291576  |
| C | 6.76548424055969  | -7.87049681127015 | 2.43335734506353  |
| H | 5.35469423800524  | -7.44529962390169 | 0.83289637095488  |
| H | 5.20347540273190  | -6.35987456310894 | 2.24305727875251  |
| H | 7.45657157720251  | -8.43665213399396 | 1.78874580219890  |
| H | 6.11925433984939  | -8.58781116456014 | 2.96264375689151  |

|   |                  |                   |                  |
|---|------------------|-------------------|------------------|
| H | 7.35889860525393 | -7.32319033726041 | 3.18260230859001 |
| C | 8.56227121501548 | -3.24623378425787 | 3.28039672810006 |
| H | 6.63953590101572 | -4.00976696367116 | 2.63871822503954 |
| H | 6.53419592497004 | -2.80895226149427 | 3.95432131008167 |
| H | 9.07306551204320 | -3.51908324367679 | 2.34543589244073 |
| H | 8.73566236202380 | -4.04204711142018 | 4.02081524022678 |
| H | 9.00722827878230 | -2.31587030673910 | 3.66586354978323 |
