# Supplementary material for: Piezo-Responsive Hydrogen-Bonded Frameworks Based on Vanillin-Barbiturate Conjugates
Source: MDPI journal article supplement (doi:10.3390/molecules27175659), 2022-09-02
Supplement: s1 [file s1]

# Supporting Information

for

## Piezo-responsive hydrogen-bonded frameworks based on vanillin–barbiturate conjugates

By

Anna S. Nebalueva,<sup>a</sup> Alexandra A. Timralieva,<sup>a</sup> Roman V. Sadovnichii,<sup>a</sup> Alexander S. Novikov,<sup>a</sup> Mikhail S. Zhukov,<sup>a</sup> Aleksandr S. Aglikov,<sup>a</sup> Anton A. Muravev,<sup>a</sup> Tatiana V. Sviridova,<sup>b</sup> Vadim P. Boyarskiy,<sup>c</sup> Andrei L. Kholkin,<sup>d</sup> and Ekaterina V. Skorb<sup>\*a</sup>

### Table of contents

|                                                                                                                              |   |
|------------------------------------------------------------------------------------------------------------------------------|---|
| Figure S1. <sup>1</sup> H NMR spectrum of compound <b>3a</b> (DMSO-d <sub>6</sub> , 400 MHz, 298 K).....                     | 2 |
| Figure S2. <sup>13</sup> C NMR spectrum of compound <b>3a</b> (DMSO-d <sub>6</sub> , 101 MHz, 298 K).....                    | 2 |
| Figure S3. <sup>1</sup> H NMR spectrum of compound <b>3b</b> (DMSO-d <sub>6</sub> , 400 MHz, 298 K).....                     | 3 |
| Figure S4. <sup>13</sup> C NMR spectrum of compound <b>3b</b> (DMSO-d <sub>6</sub> , 101 MHz, 298 K).....                    | 3 |
| Figure S5 Arrangement of the drops of precursors transferred onto the glass slide. ....                                      | 4 |
| Figure S6. Optical microscopy images in polarized light of compound <b>3a</b> (left) and compound <b>3b</b> (right)<br>..... | 4 |
| Figure S7. Force–distance curve of compound <b>3a</b> (left) and <b>3b</b> (right) .....                                     | 4 |

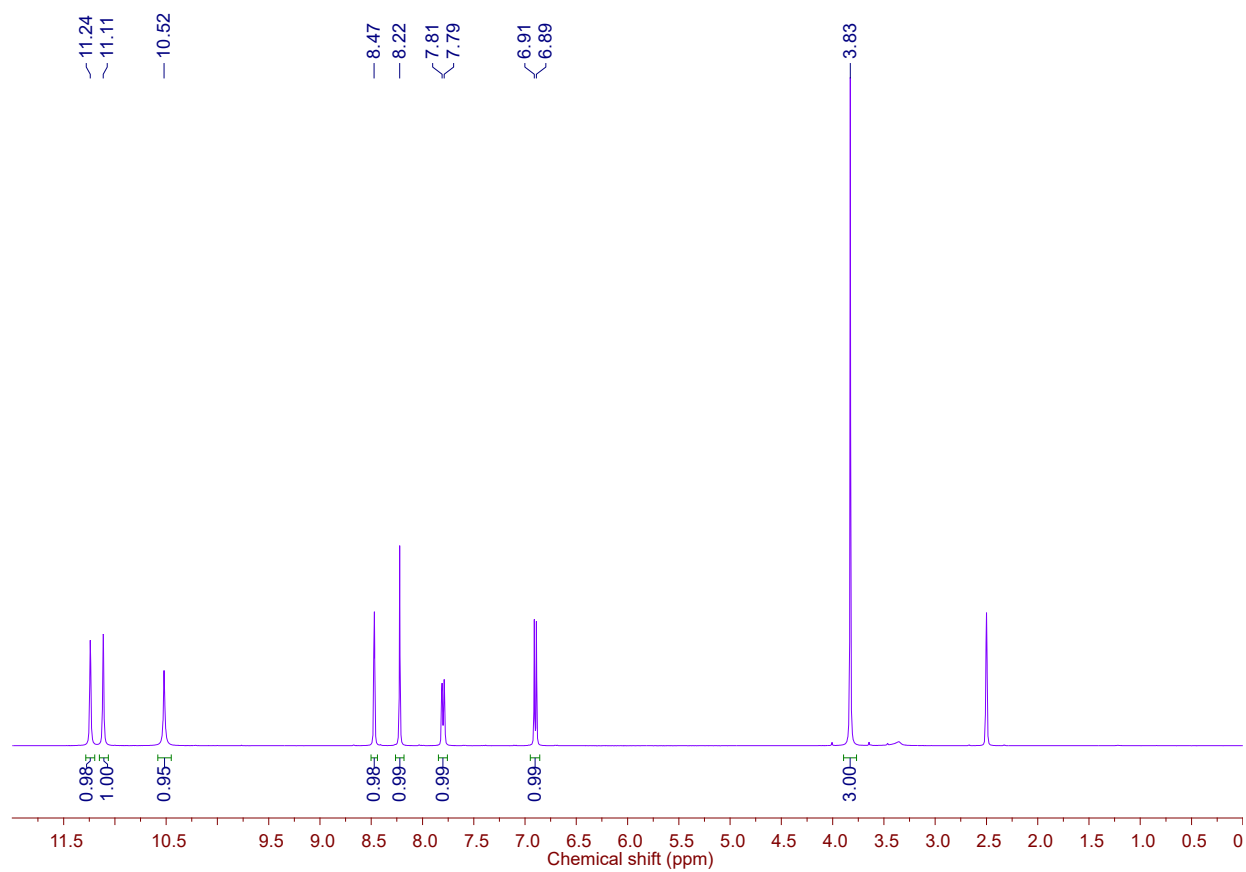

Figure S1. <sup>1</sup>H NMR spectrum of compound **3a** (DMSO-d<sub>6</sub>, 400 MHz, 298 K).

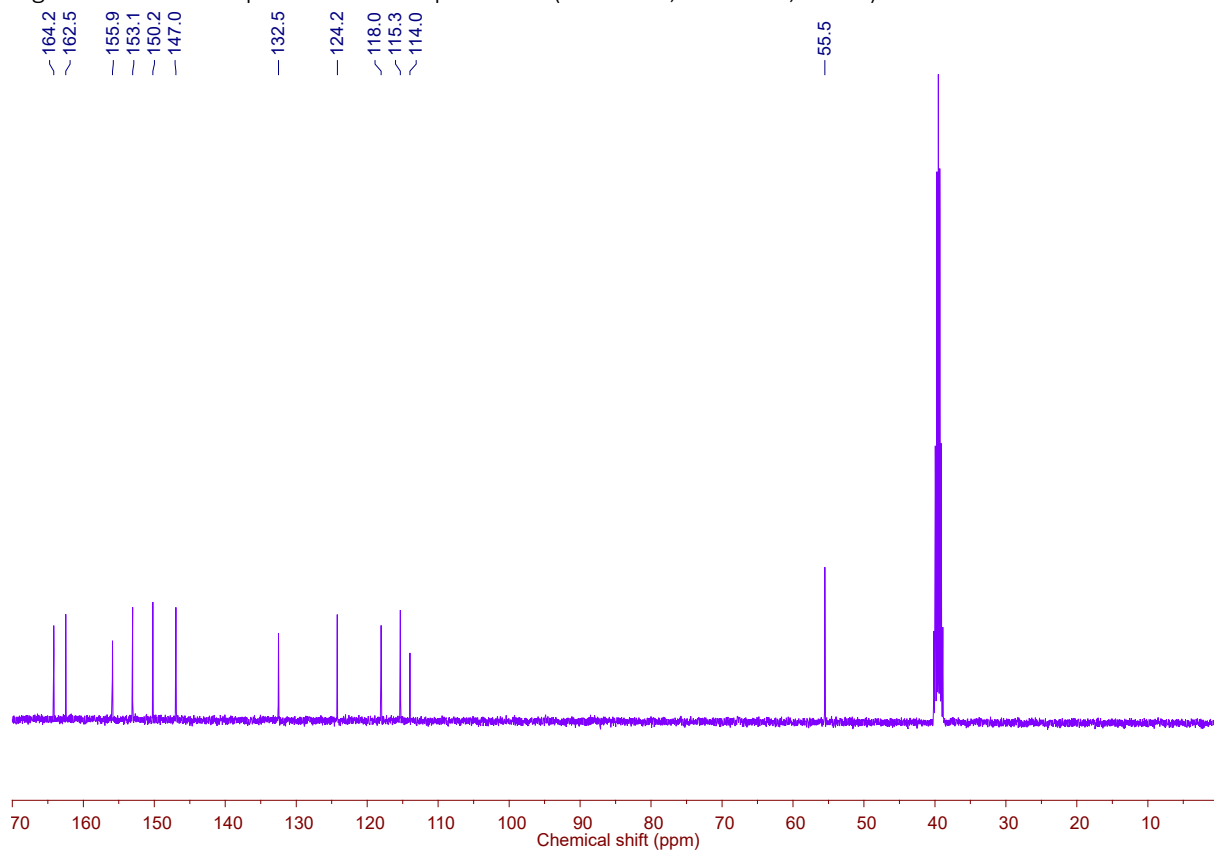

Figure S2. <sup>13</sup>C NMR spectrum of compound **3a** (DMSO-d<sub>6</sub>, 101 MHz, 298 K).

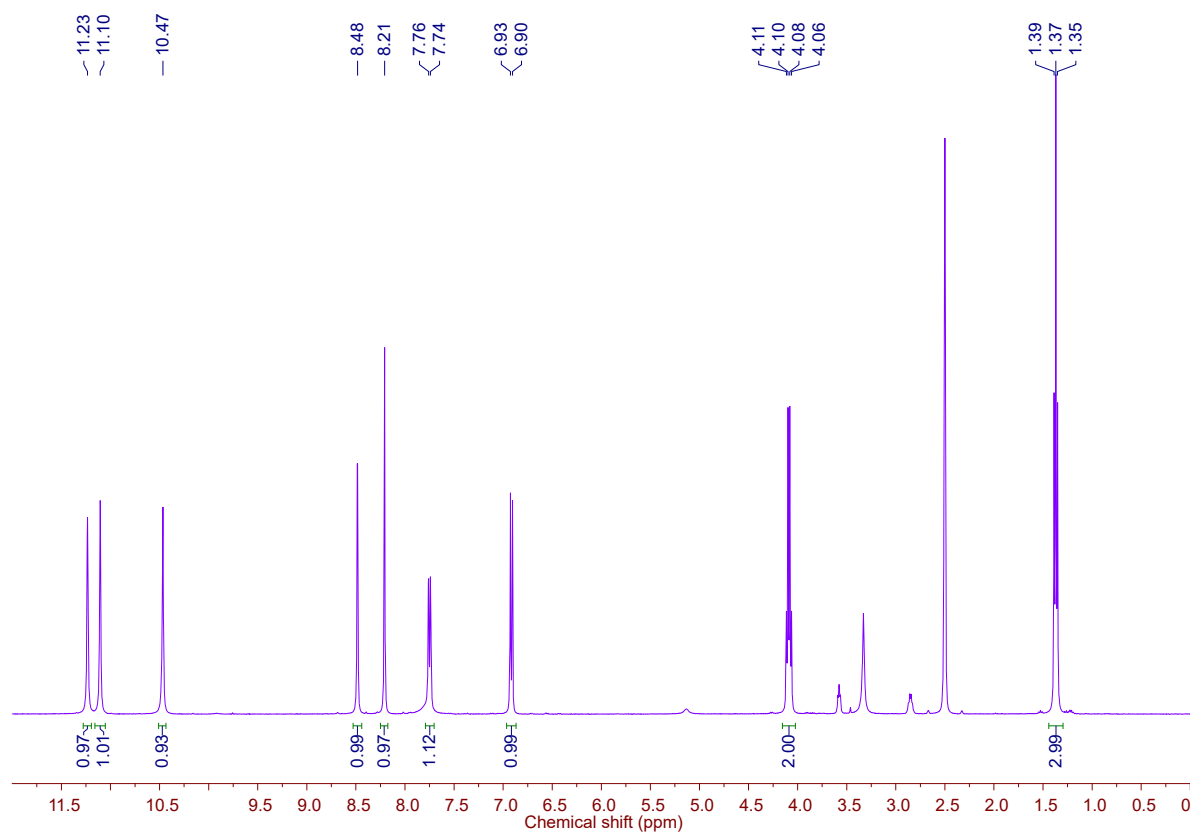

Figure S3. <sup>1</sup>H NMR spectrum of compound **3b** (DMSO-d<sub>6</sub>, 400 MHz, 298 K).

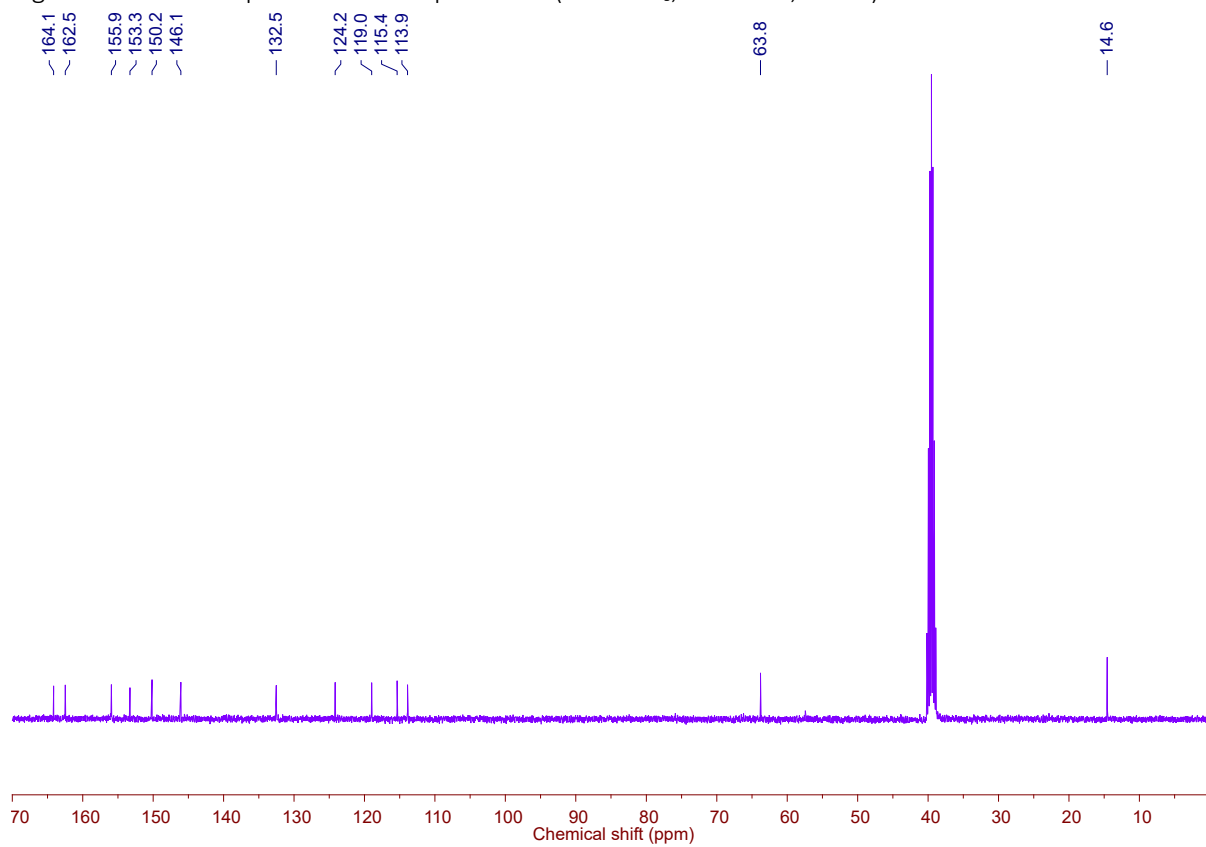

Figure S4. <sup>13</sup>C NMR spectrum of compound **3b** (DMSO-d<sub>6</sub>, 101 MHz, 298 K).

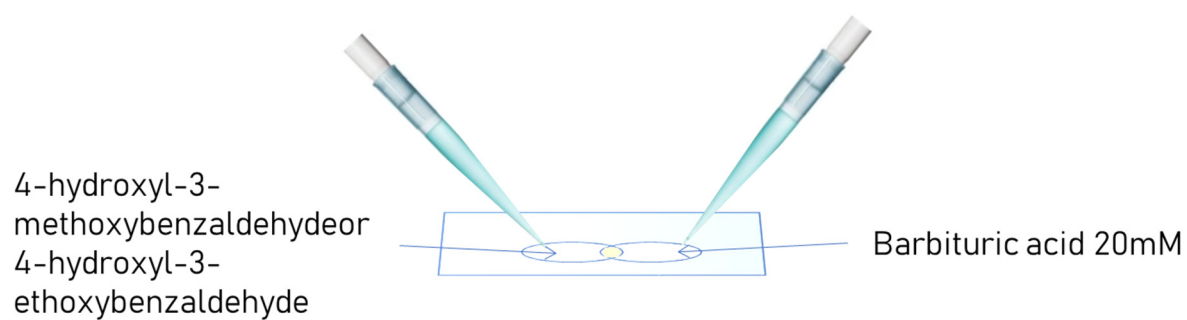

Figure S5 Arrangement of the drops of precursors transferred onto the glass slide.

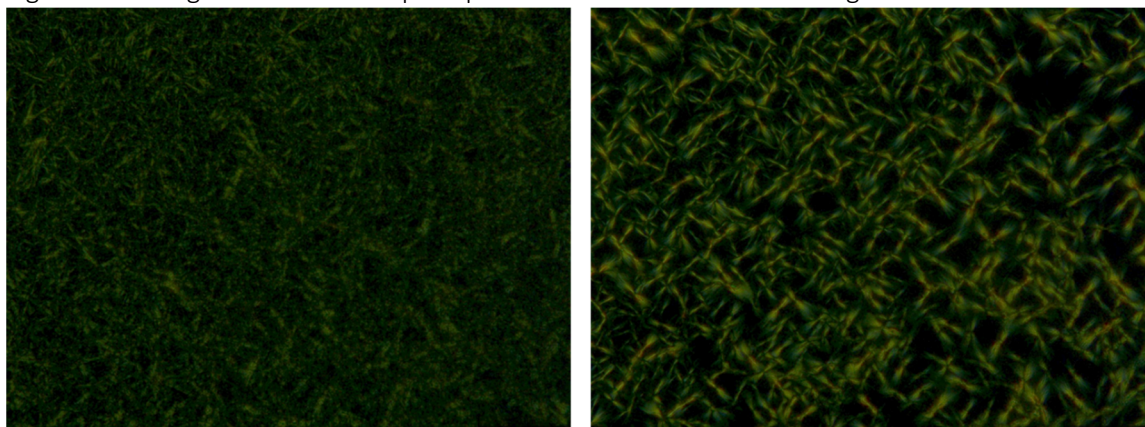

Figure S6. Optical microscopy images in polarized light of compound **3a** (left) and compound **3b** (right).

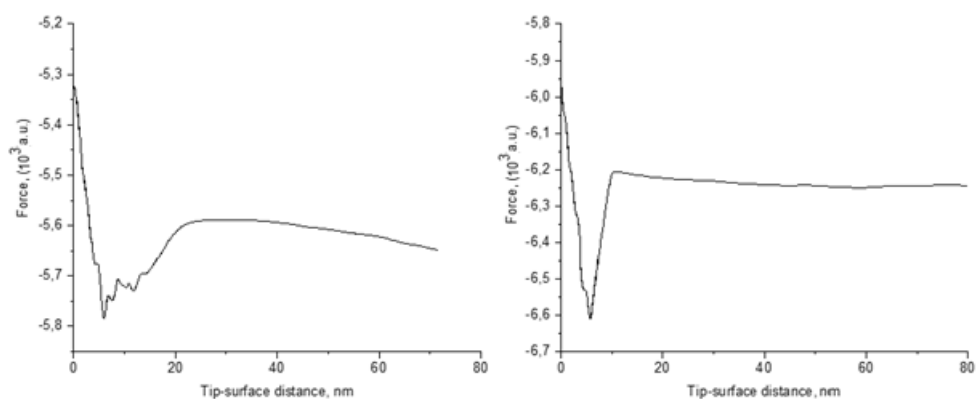

Figure S7. Force-distance curve of compound **3a** (left) and **3b** (right)
